# Supplementary material for: Gender Differences in Social Networks Based on Prevailing Kinship Norms in the Mosuo of China
Source: Preprints.org preprint supplement (doi:10.20944/preprints202104.0035.v2), 2021-06-10
Supplement: Supplementary file 3 [file supplementary]

SUPPLEMENTARY INFORMATION

**SI Table 1**. Network-level density, centralization, transitivity, and distance statistics for Mosuo matrilineal and patrilineal networks.

|  | Density | Degree Centralization | Betweenness Centralization | Closeness Centralization | Transitivity (Average Clustering) | Mean Distance (Avg. Shortest Path Length) |
| --- | --- | --- | --- | --- | --- | --- |
| *Matriliny* | 0.019 | 0.079 | 0.308 | 0.274 | 0.152 | 4.36 |
| *Patriliny* | 0.027 | 0.082 | 0.297 | 0.114 | 0.240 | 6.41 |

**SI Figure 1. Kernel density plots for men (blue) and women (purple) in matriliny and patriliny, as labeled for (a) degree, (b) betweenness centrality, (c) closeness centrality, and (d) transitivity.**

**(a)**
